# Supplementary material for: Evaluation of the Performance of Rapid Diagnostic Tests for Malaria Diagnosis and Mapping of Different Plasmodium Species in Mali
Source: MDPI journal article supplement (doi:10.3390/ijerph21020228), 2024-02-15
Supplement: s1 [file s1]

**Table S1.** Detail of the total number and the prevalence of positive and negative Malaria Rapid Diagnostic Tests in each health center.

| Area      | Health district | RDT collection site | Result         |                | Total |
|-----------|-----------------|---------------------|----------------|----------------|-------|
|           |                 |                     | Positive N (%) | Négative N (%) |       |
| Kayes     | Diéma           | Torodo              | 6 (2.2)        | 272(97.8)      | 278   |
|           |                 | Lakamané            | 0 (0.0)        | 89 (100)       | 89    |
|           |                 | Lattakaf            | 0 (0.0)        | 47 (100)       | 47    |
|           |                 | Débomassassi        | 0 (0.0)        | 48 (100)       | 48    |
|           |                 | Koungo              | 3 (75.0)       | 1 (25.0)       | 4     |
|           |                 | Lambidou            | 0 (0.0)        | 13 (100)       | 13    |
|           |                 |                     |                |                |       |
|           | Yélimané        | kodié               | 12 (19.0)      | 51(81.0)       | 63    |
|           |                 | Csréf               | 6 (4,1)        | 139 (95.9)     | 145   |
|           |                 | Dogofry             | 0 (0.0)        | 23 (100.0)     | 23    |
|           |                 | Bandiougoula        | 0 (0.0)        | 11 (100.0)     | 11    |
|           |                 |                     |                |                |       |
|           | sub total       |                     | 27 (3.7)       | 694 (96.3)     | 721   |
| Koulikoro | Nara            | Bagoïni             | 0 (0.0)        | 50 (100.0)     | 50    |
|           |                 | Mourdiah            | 0 (0.0)        | 68 (100.0)     | 68    |
|           |                 | Kassakaré           | 4 (12.1)       | 29 (87.9)      | 33    |
|           |                 | Alasso              | 1 (3.4)        | 28 (96.6)      | 29    |
|           |                 | Tiapato             | 3 (14.3)       | 18 (85.7)      | 21    |
|           |                 | Waourou             | 0 (0.0)        | 13 (100.0)     | 13    |
|           | Kangaba         | Naréna              | 2 (1.6)        | 126 (98.4)     | 128   |
|           |                 | Cscom Central       | 14 (28.0)      | 36 (72.0)      | 50    |
|           |                 | Séléfougou          | 0 (0.0)        | 30 (100.0)     | 30    |
|           |                 |                     |                |                |       |
|           | sub total       |                     | 24 (5.7)       | 398 (94.3)     | 422   |
| Sikasso   | Kadiolo         | cscom central       | 110 (59.5)     | 75 (40.5)      | 185   |
|           |                 | Zégoua              | 28 (38.89)     | 44 (61.1)      | 72    |
|           | sub total       |                     | 138 (53.7)     | 119 (46.3)     | 257   |
| Segou     | Barouéli        | Cscom Central       | 5 (41.7)       | 7 (58.3)       | 12    |
|           |                 | Dioforogo           | 13 (65.0)      | 7 (35.0)       | 20    |

|                   |        |                 |                    |                    |             |
|-------------------|--------|-----------------|--------------------|--------------------|-------------|
|                   |        | Tamani          | 7 (35.0)           | 13 (65.0)          | 20          |
|                   |        | NGara           | 16 (80.0)          | 4 (20.0)           | 20          |
|                   |        | Tigui           | 20 (100.0)         | 0 (0.0)            | 20          |
|                   |        | bananido        | 7 (50.0)           | 7 (50.0)           | 14          |
|                   |        | N'Gossola       | 5 (31.3)           | 11(68.75)          | 16          |
|                   |        | Nianzana        | 20 (66.7)          | 10 (33.3)          | 30          |
|                   |        | yerebougou      | 16 (80.0)          | 4 (20.0)           | 20          |
|                   |        | Csréf           | 8 (40.0)           | 12 (60.0)          | 20          |
|                   |        | Ndjila          | 10 (50.0)          | 10 (50.0)          | 20          |
| <b>sub total</b>  |        |                 | <b>127 (59.9)</b>  | <b>85 (40.1)</b>   | <b>212</b>  |
| <b>Mopti</b>      | Mopti  | Soufouroulaye   | 79 (34.3)          | 151 (65.7)         | 230         |
|                   |        | Fatoma          | 0 (0.0)            | 35 (100.0)         | 35          |
|                   |        | Sévaré II       | 136 (91.9)         | 12 (8.1)           | 148         |
| <b>sub total</b>  |        |                 | <b>215 (52.1)</b>  | <b>198 (47.9)</b>  | <b>413</b>  |
| <b>Tombouctou</b> |        | Gourma Rharous  | 400 (66.9)         | 198 (33.1)         | 598         |
| <b>Gao</b>        | Gao    | Csref d'Ansongo | 30 (13.4)          | 194 (86.6)         | 224         |
| <b>Menaka</b>     | Ménaka | Menaka          | 21 (36.8)          | 36 (63.2)          | 57          |
| <b>Kidal</b>      | Kidal  | Cscom d'Aliou   | 0 (0.0)            | 54 (100.0)         | 54          |
|                   |        | CSRéf de Kidal  | 20 (10.3)          | 120 (85.7)         | 140         |
| <b>sub total</b>  |        |                 | <b>20 (10.3)</b>   | <b>174 (89.7)</b>  | <b>194</b>  |
| <b>Total</b>      |        |                 | <b>1002 (32.3)</b> | <b>2096 (67.7)</b> | <b>3098</b> |

3098 RDT cassettes were collected at the various study sites, of which 67.7 were malaria-negatives.
